# Supplementary material for: Kidney stone disease and cardiovascular events: a study on bidirectional causality based on mendelian randomization
Source: PubMed Central journal article supplement — Transl Androl Urol. 2021 Dec;10(12):4344–52. doi: 10.21037/tau-21-899 (PMC8749067; doi:10.21037/tau-21-899), 2021-12
Supplement: tau-10-12-4344-supplementary.pdf [file tau-10-12-4344-supplementary.pdf]

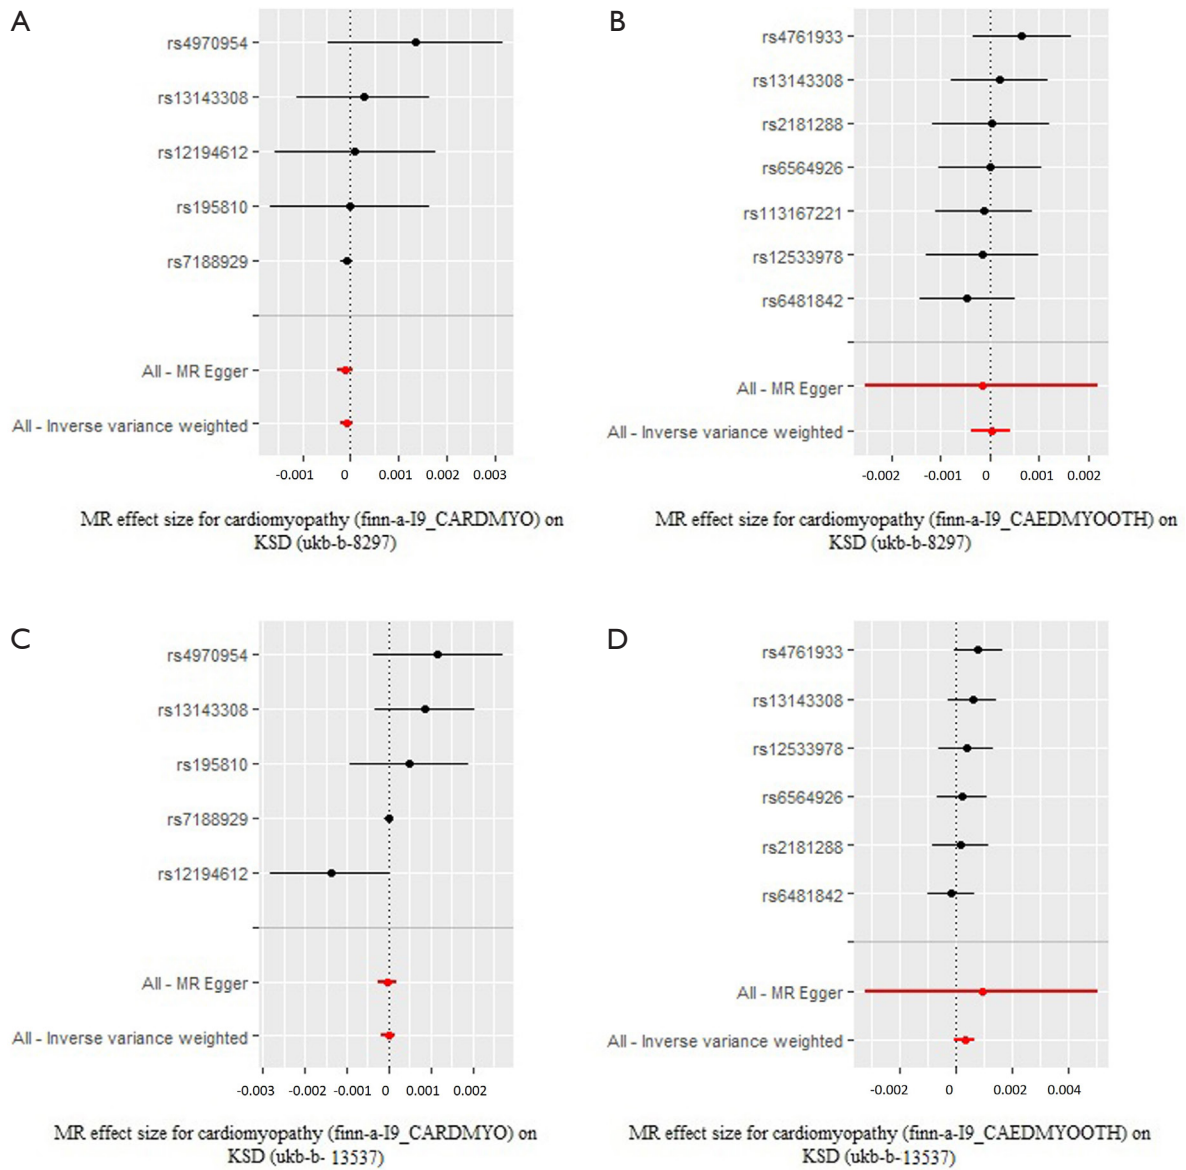

**Figure S1** Mendelian randomization study of the effect of cardiomyopathy on KSD. (A,B) Forest plots were presented for the MR effect size for cardiomyopathy-fin-a-I9\_CARDMYO (A) and cardiomyopathy-fin-a-I9\_CARDMYOOTH (B) on KSD-ukb-b-8297. (C,D) Forest plots were presented for the MR effect size for cardiomyopathy-fin-a-I9\_CARDMYO (C) and cardiomyopathy-fin-a-I9\_CARDMYOOTH (D) on KSD-ukb-b-13537. The results showed that cardiomyopathy didn't affect the outcome of KSD ( $P > 0.05$ ). For the forest plots, red points showing the combined causal estimate using all SNPs together in a single instrument, using each of two different methods [inverse-variance weighted (IVW) and MR-Egger]. Horizontal lines denote 95% confidence intervals.
